# Supplementary material
Source: publisher figshare collection journal article supplement (https://acs.figshare.com/ndownloader/files/5668578)
Supplement: Supplementary file 1 [file 5668578]

**Supplementary Material**  
**for**  
**An Integrated Fluorescence Detection System in**  
**Poly(dimethylsiloxane) for Microfluidic Applications.**

Michael L. Chabinyc<sup>†</sup>, Daniel T. Chiu<sup>†</sup>, J. Cooper McDonald<sup>†</sup>, Abraham D. Stroock<sup>†</sup>,  
James F. Christian<sup>‡</sup>, Arie M. Karger<sup>‡</sup>, George M. Whitesides<sup>†,\*</sup>

<sup>†</sup> Department of Chemistry and Chemical Biology  
Harvard University  
12 Oxford St.  
Cambridge, MA 02138

<sup>‡</sup> Radiation Monitoring Devices, Inc.  
Watertown, MA 02472

**Figure S1.** Transmission spectra of the polycarbonate filters and the emission spectrum of the blue LED. The dashed curve (◆) shows the wavelengths of light emitted from the blue LED. The solid curves show the transmission spectra of the filter (Roscolux #382, congo blue) used to absorb the long wavelength emission from the blue LED (■) and the filter (Roscolux 312, canary yellow) used to prevent scattered excitation light from reaching the  $\mu$ APD(●).

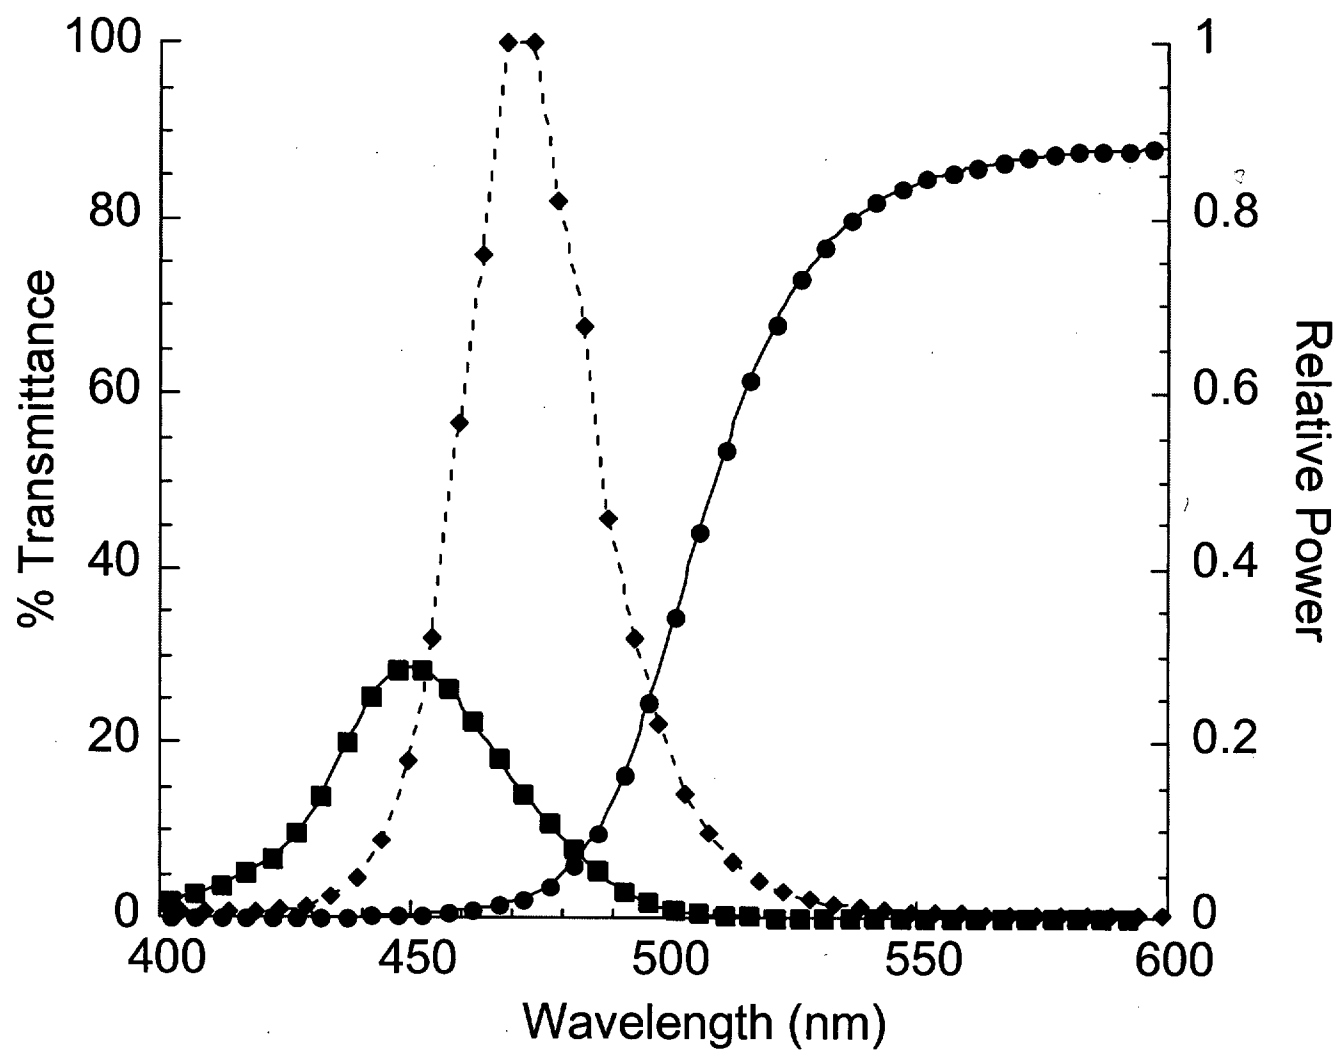

Figure S1
